# Supplementary material for: Epidermal Growth Factor Receptor (EGFR) and SMAD4 negatively correlated in the progression of gallbladder cancer in Eastern Indian patients
Source: PubMed Central journal article supplement — BMC Gastroenterol. 2024 Dec 3;24:446. doi: 10.1186/s12876-024-03485-4 (PMC11613908; doi:10.1186/s12876-024-03485-4), 2024-12-03

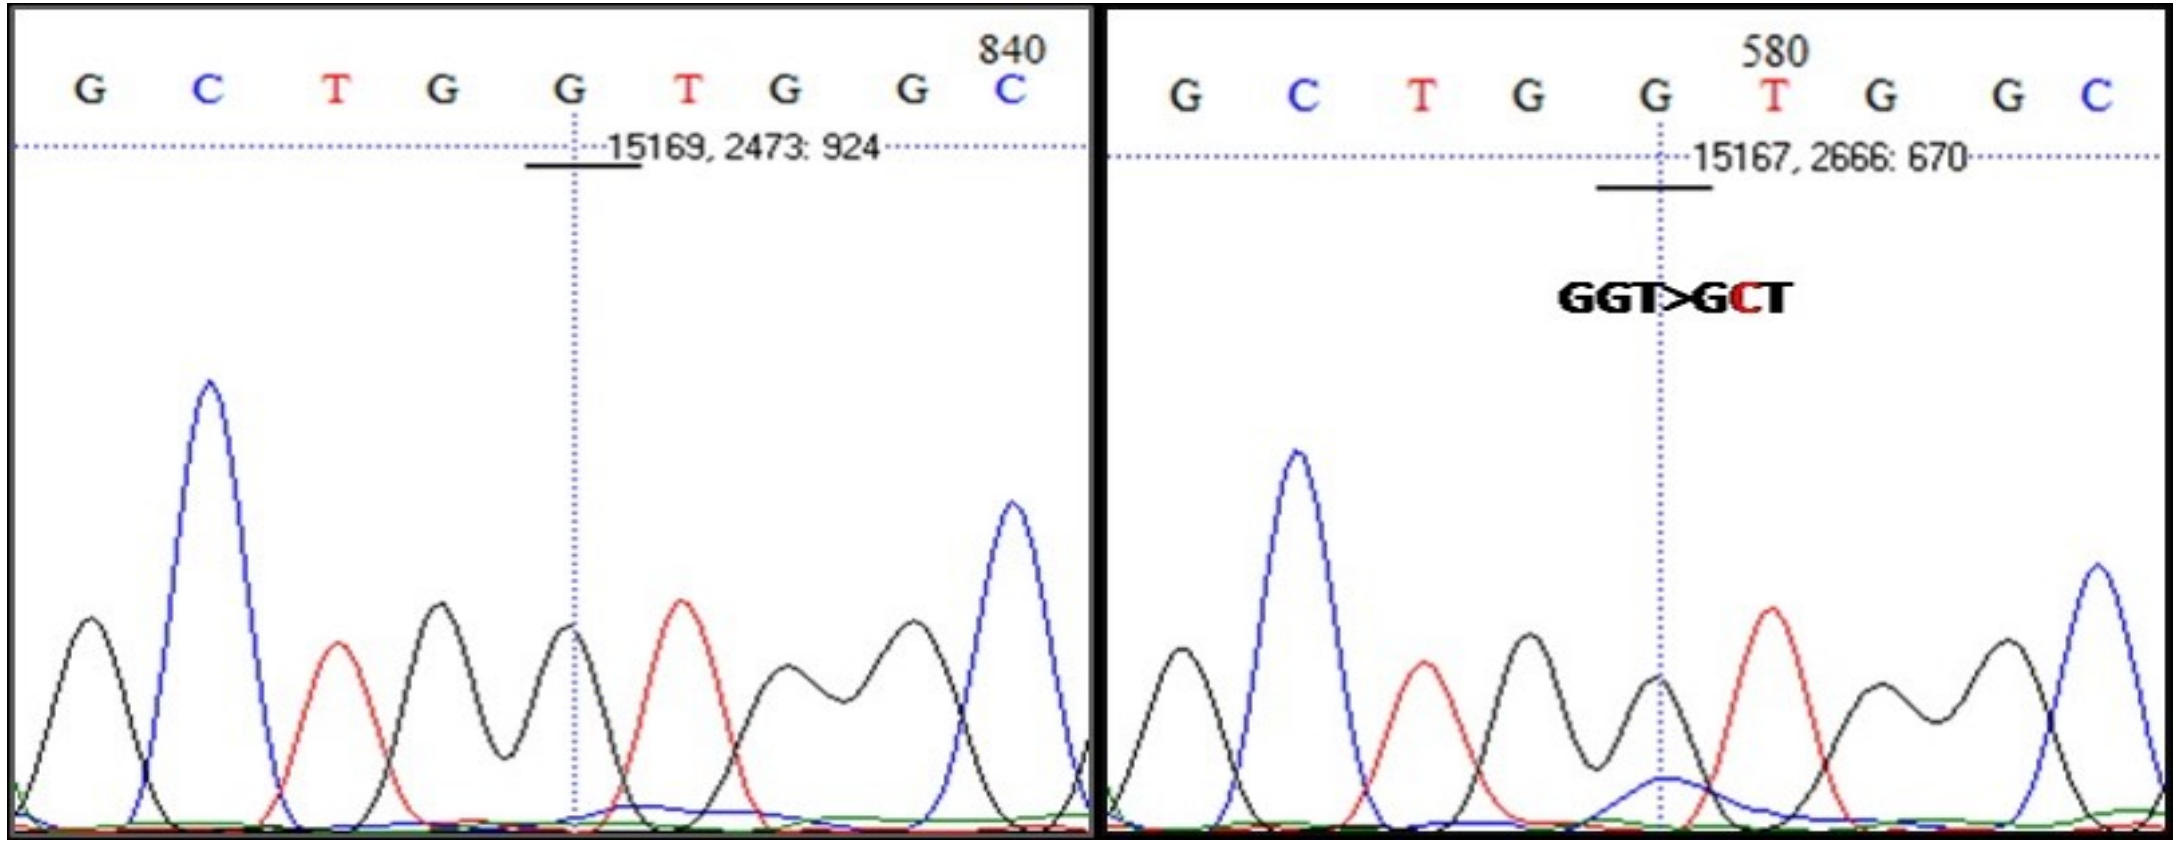

**a.**

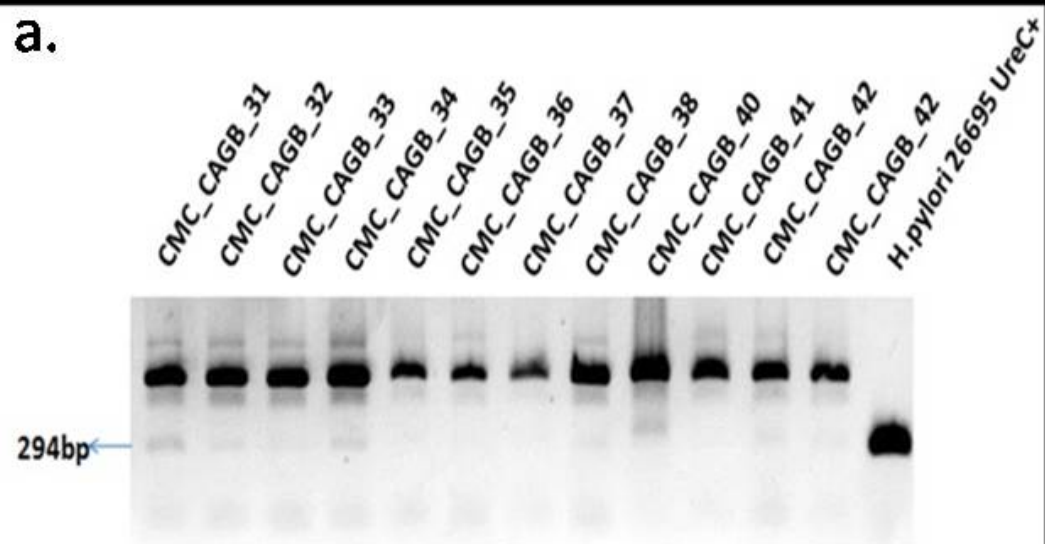

PCR AMPLIFICATION OF TUMOUR SAMPLES FOR  
H. pylori INFECTION DETECTION (UREC +ve)

**b.**

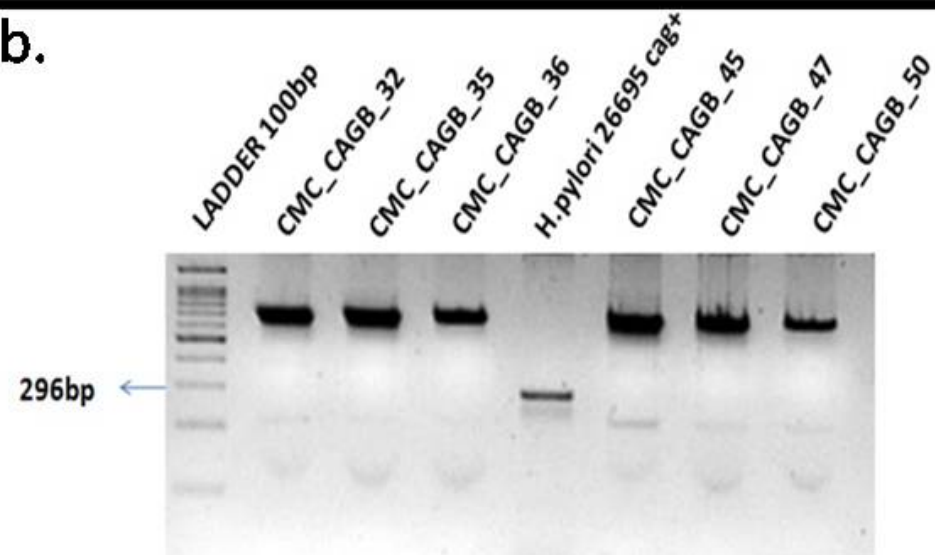

PCR AMPLIFICATION OF TUMOUR SAMPLES FOR  
H. pylori INFECTION

a.

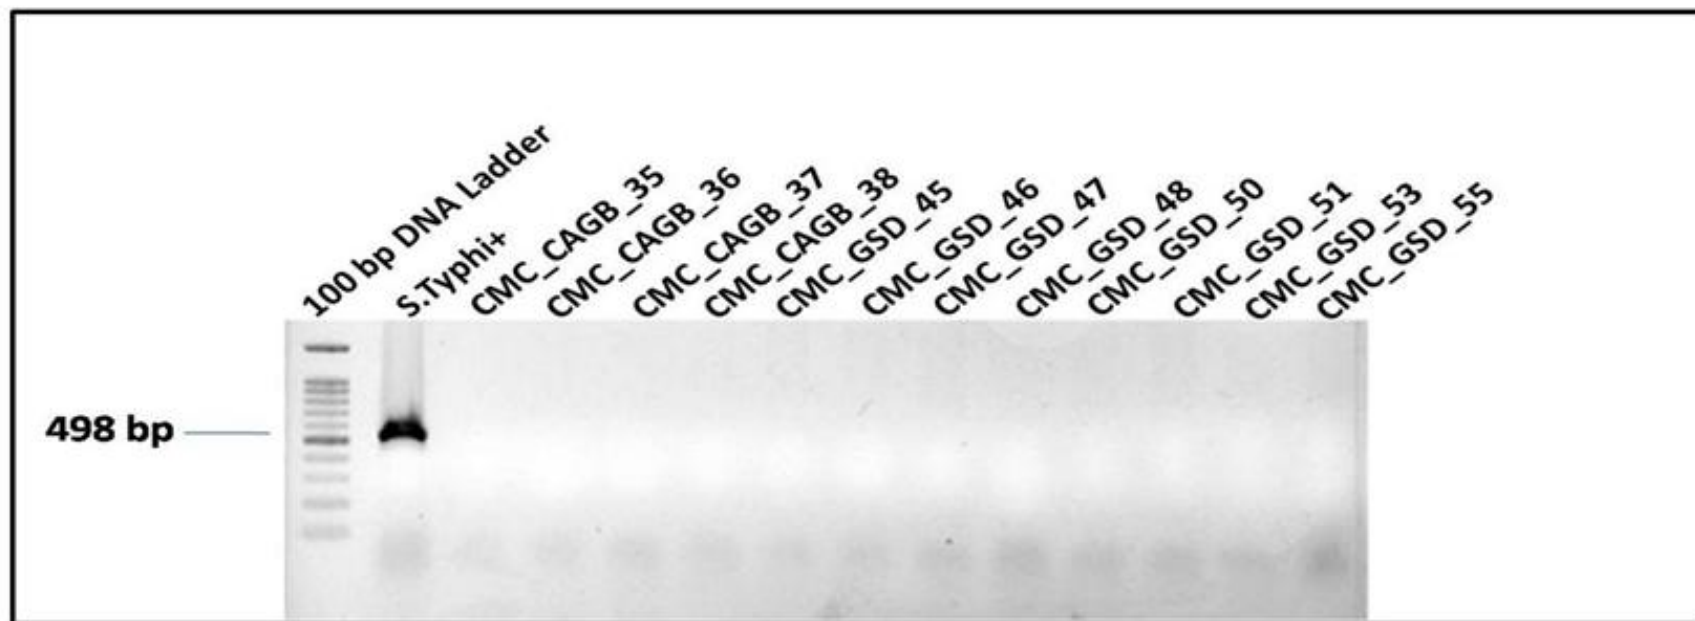

PCR AMPLIFICATION OF TUMOUR SAMPLES FOR  
*S. typhi* infection (Flic+)

b.

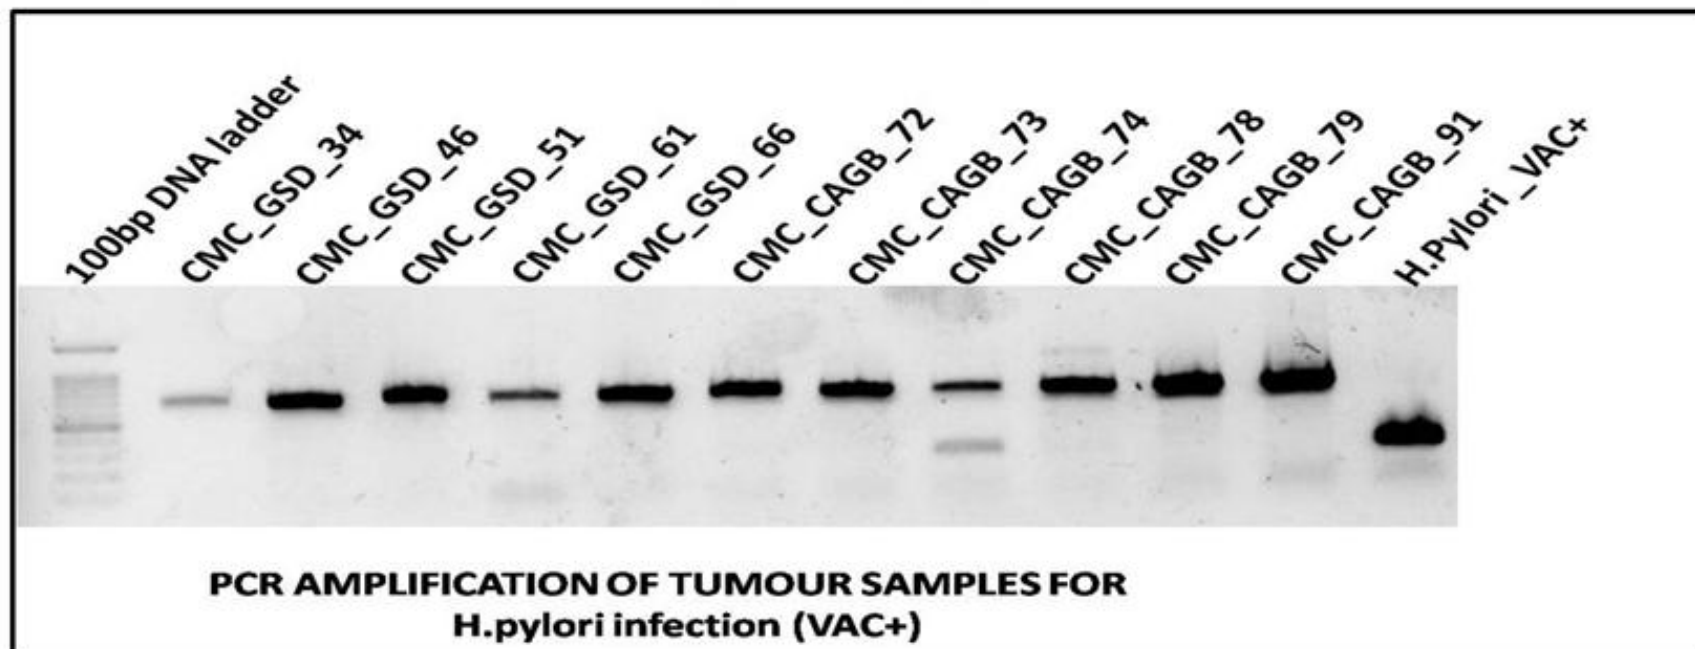

PCR AMPLIFICATION OF TUMOUR SAMPLES FOR  
*H. pylori* infection (VAC+)

a.

### CCND1 A870G\_SNP

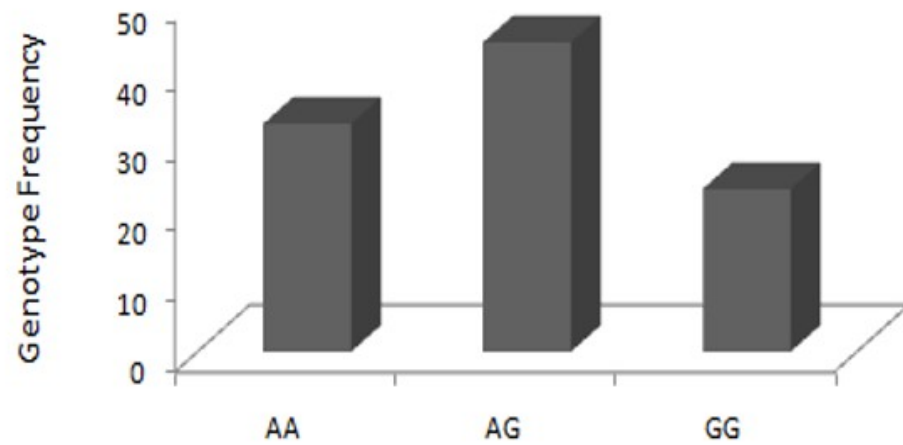

b.

### CCND1 A870G\_SNP

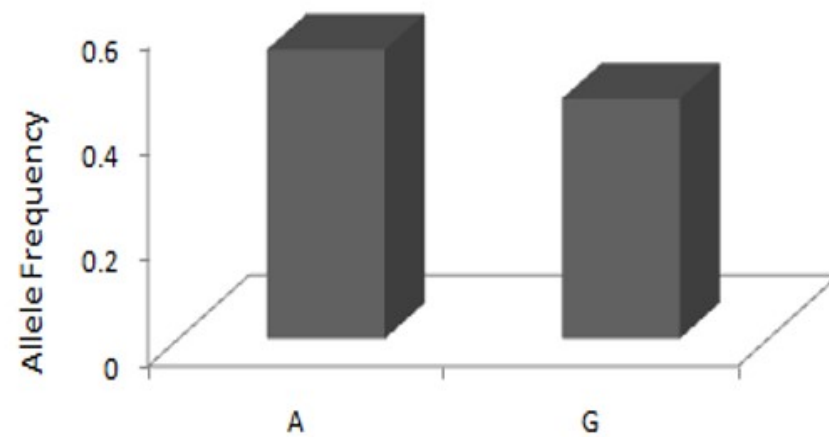

a.

### ERBB2 I655V\_SNP

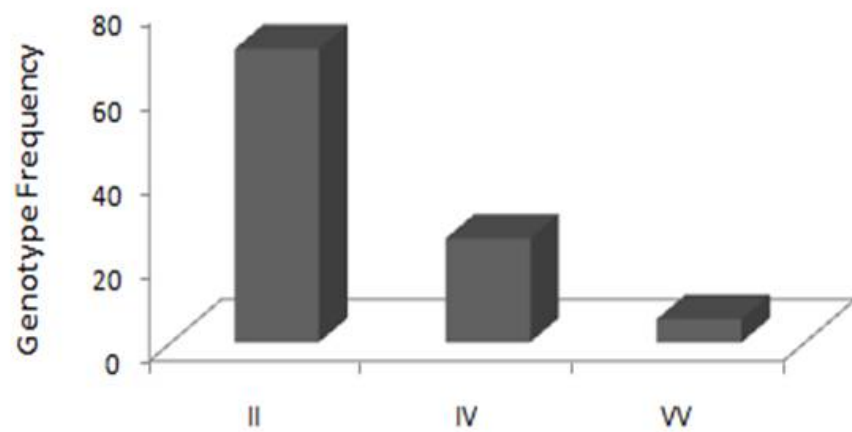

b.

### ERBB2 I655V\_SNP

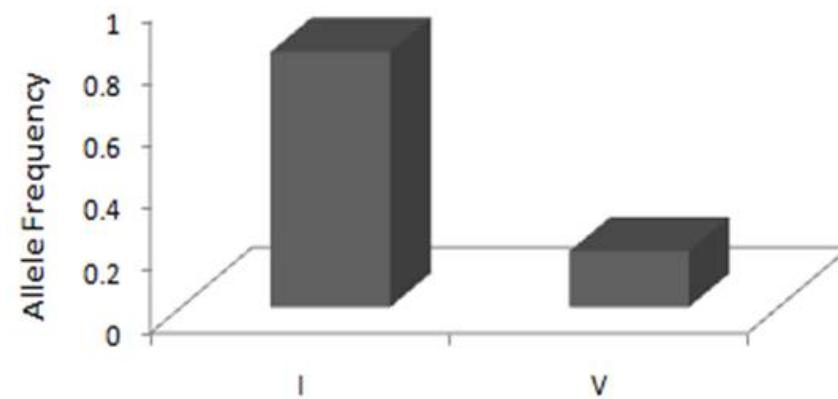

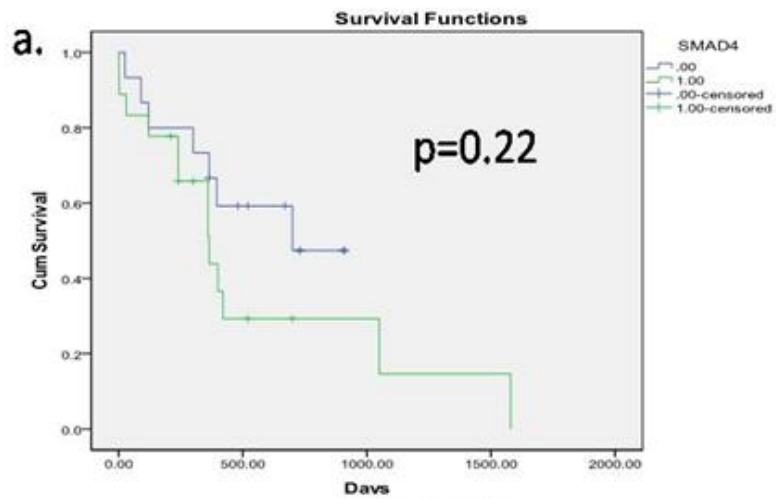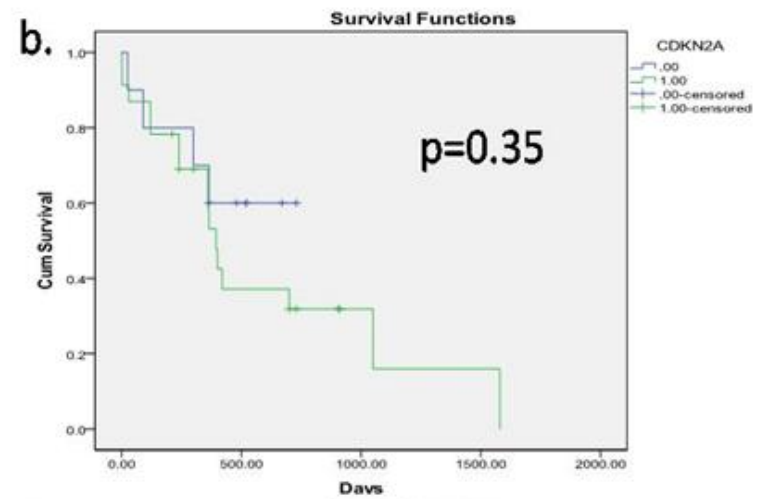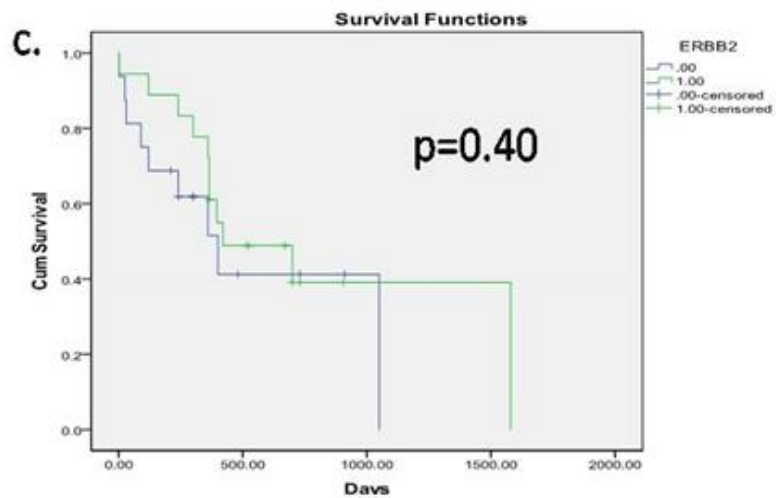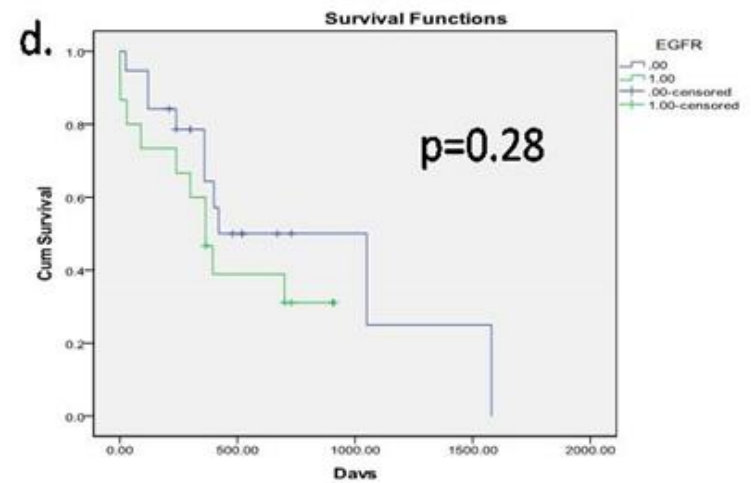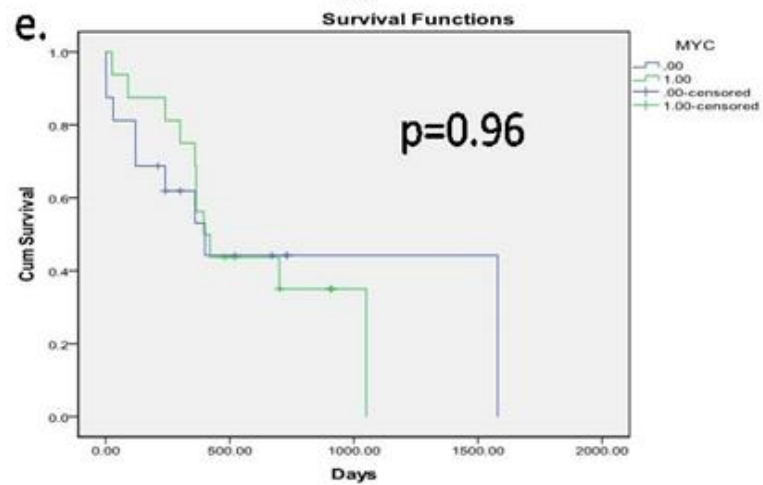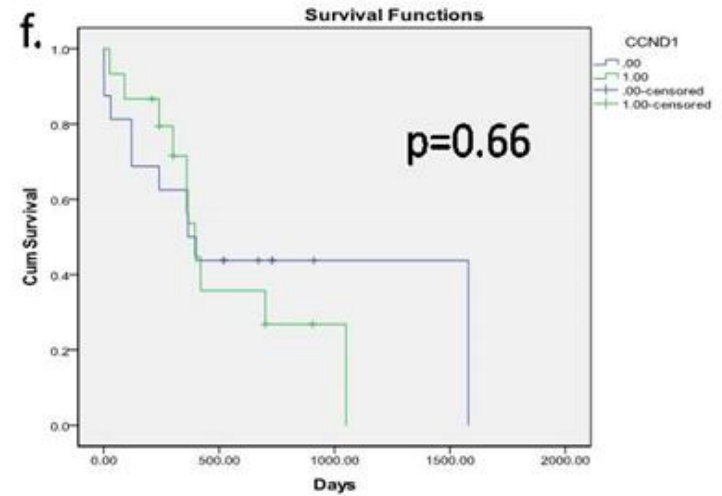

Supplement: 12876_2024_3485_MOESM7_ESM.pdf [file 12876_2024_3485_MOESM7_ESM.pdf]
